# Supplementary material for: O 3 and PAN in southern Tibetan Plateau determined by distinct physical and chemical processes
Source: Copernicus journal article supplement (doi:10.5194/egusphere-2023-182), 2023-03-29
Supplement: Supplementary file 1 [file egusphere-2023-182-supplement.pdf]

1 **Supplementary materials**

2 **O<sub>3</sub> and PAN in southern Tibetan Plateau determined by distinct**  
3 **physical and chemical processes**

4 Wanyun Xu<sup>1</sup>, Yuxuan Bian<sup>1</sup>, Weili Lin<sup>2</sup>, Yingjie Zhang<sup>3,a</sup>, Yaru Wang<sup>3,b</sup>, Gen Zhang<sup>1,\*</sup>,  
5 Chunxiang Ye<sup>3,\*</sup>, Xiaobin Xu<sup>1</sup>

6 <sup>1</sup> State Key Laboratory of Severe Weather & Key Laboratory for Atmospheric Chemistry of CMA, Institute of  
7 Atmospheric Composition, Chinese Academy of Meteorological Sciences, Beijing, 100081, China

8 <sup>2</sup> College of Life and Environmental Sciences, Minzu University of China, Beijing, 100081, China

9 <sup>3</sup> College of Environment, Peking University of China, Beijing, 100871, China

10 <sup>a</sup> now at School of Ecology and Nature Conservation, Beijing Forestry University, Beijing, 100083, China

11 <sup>b</sup> now at Leibniz Institute for Tropospheric Research, 04318 Leipzig, Germany

12 *Correspondence to:* Gen Zhang (zhanggen@cma.gov.cn) and Chunxiang Ye (c.ye@pku.edu.cn)

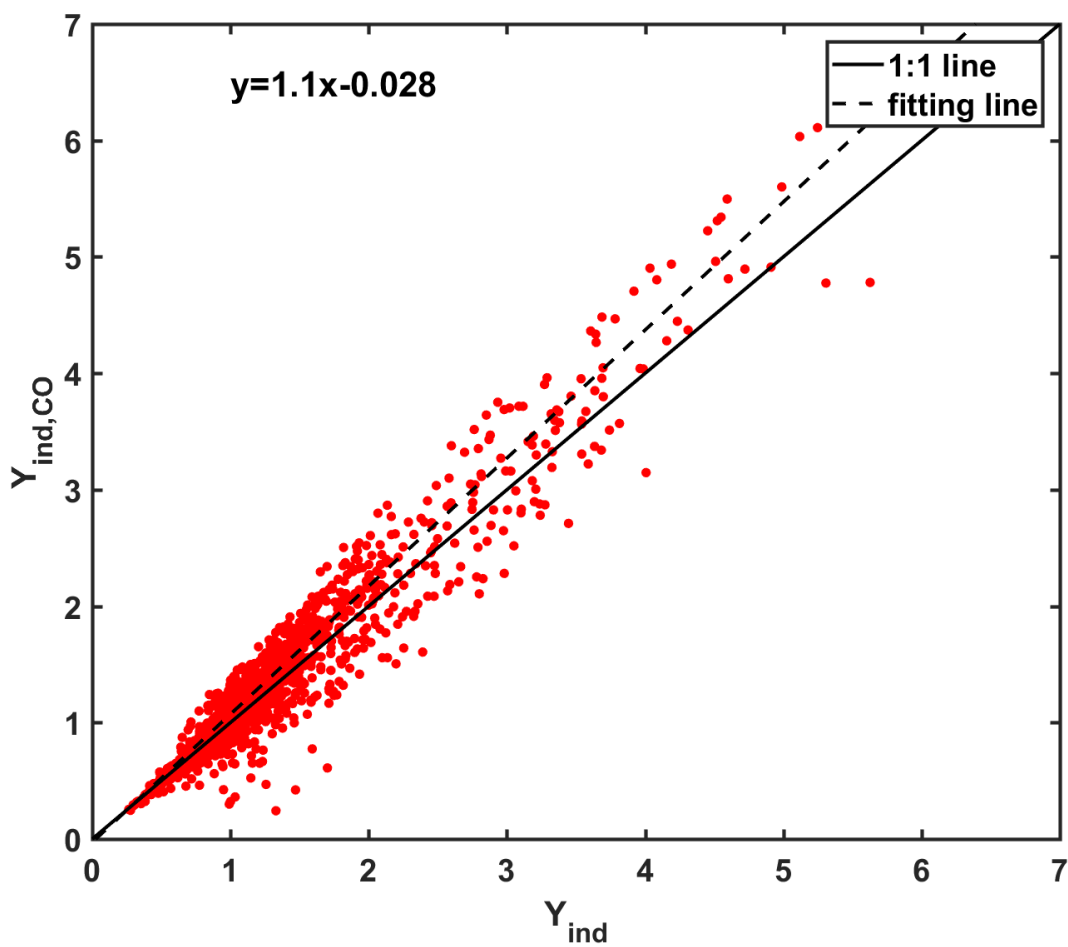

14

15 **Figure S1.** Comparison between Y indices calculated using or without using normalized CO  
16 concentrations.

17

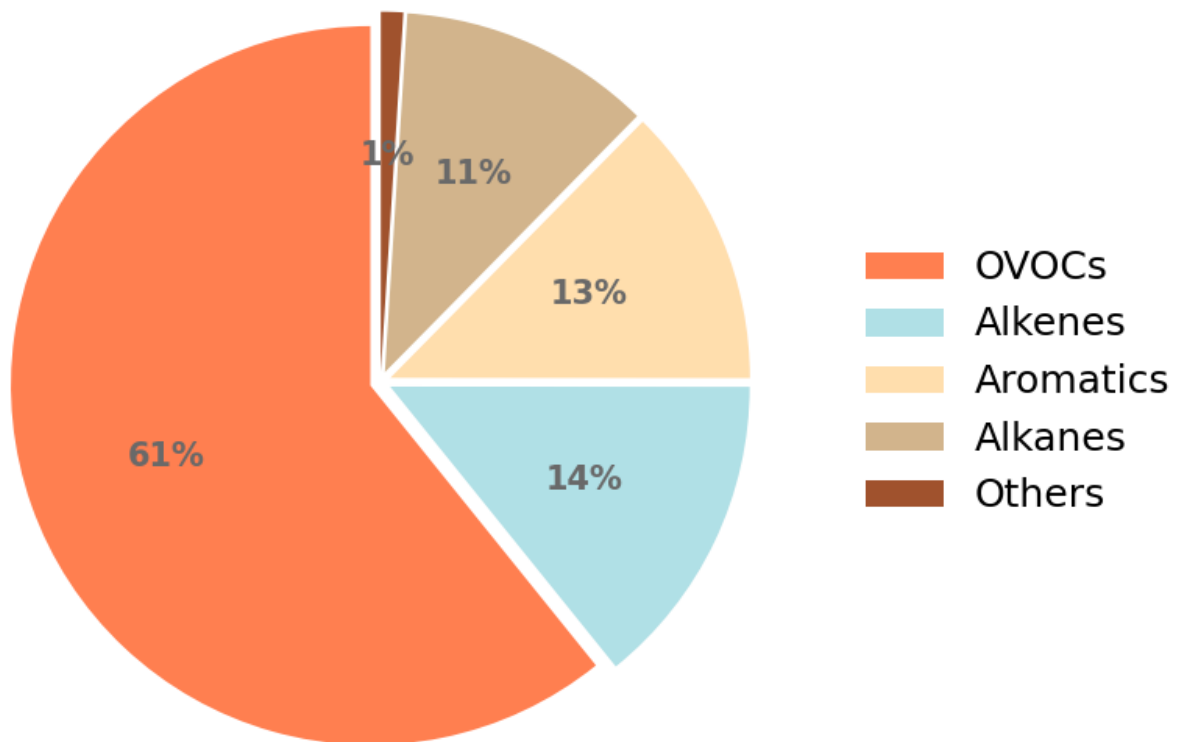

18

19 **Figure S2.** Contributions of distinct types of VOCs to total concentrations (concentrations in  
20 Propy-Equiv. ppbC).

21

22

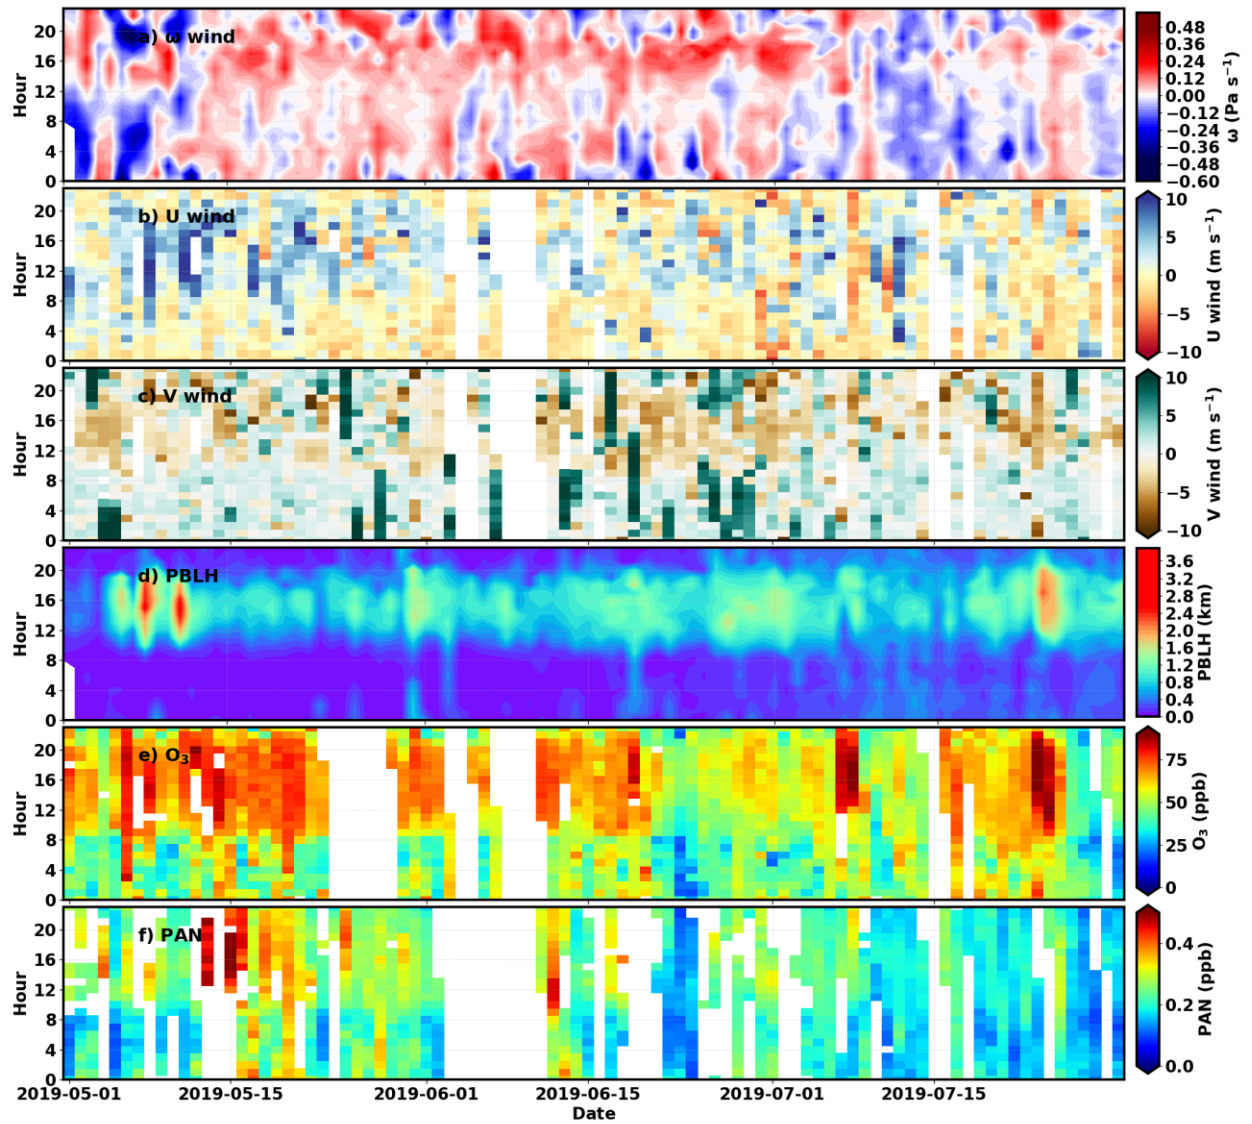

23  
 24 **Figure S3.** Season-diurnal variations of a)  $\omega$  wind (ERA5), b) surface U wind, c) surface V  
 25 wind, d) PBLH (ERA5), e) surface  $O_3$  and f) PAN between 1 May and 31 Jul 2019 at Nam Co.

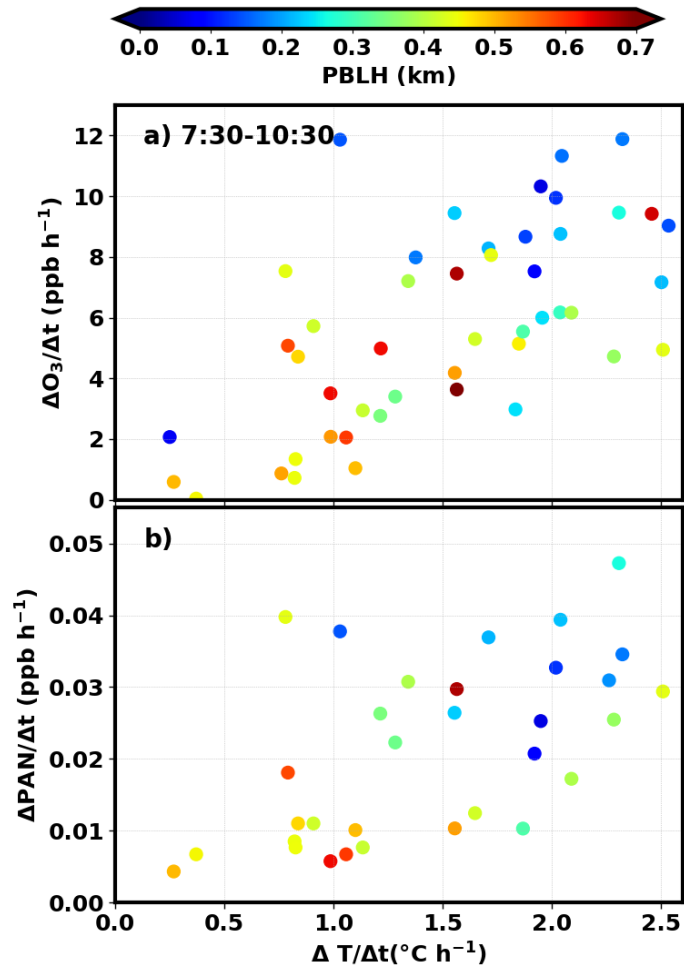

26

27 **Figure S4** Variation of the a) O<sub>3</sub> and b) PAN morning (7:30 to 10:30 LT) growth rates with  
 28 temperature growth rates, with colors representing morning time averaged PBLH (from ERA5  
 29 reanalysis data)

30

31

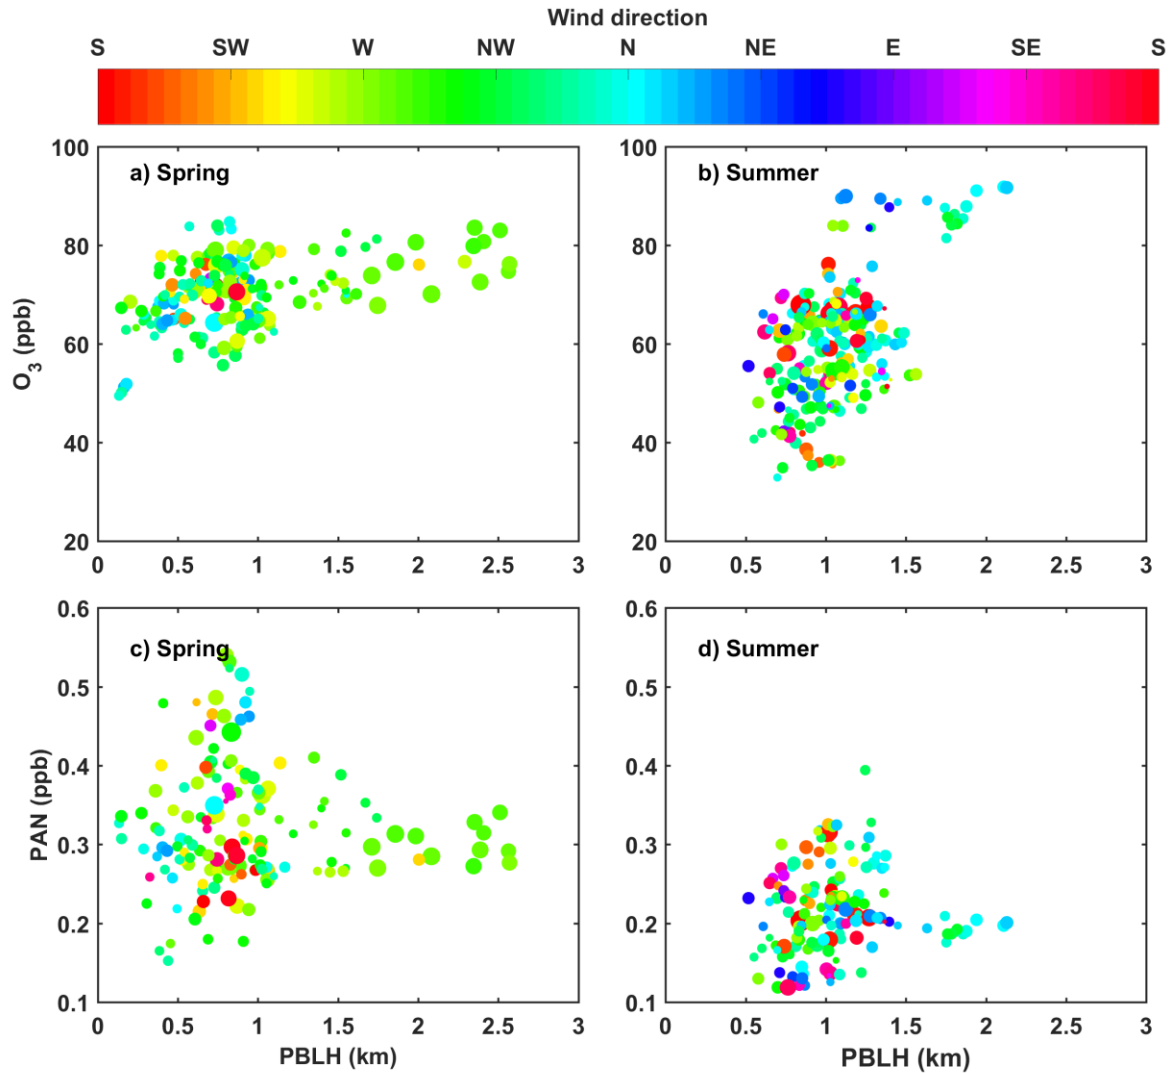

32  
 33  
 34  
 35  
 36  
 37  
 38  
 39

**Figure S5.** Variation of afternoon (12:00-18:00) O<sub>3</sub> (a,b) and PAN (c,d) with PBLH (from ERA5 reanalysis data) during spring (a,c) and summer (b,d) periods, with wind speeds and directions indicated by sizes and colors of scattered dots (precipitation associated data points excluded).

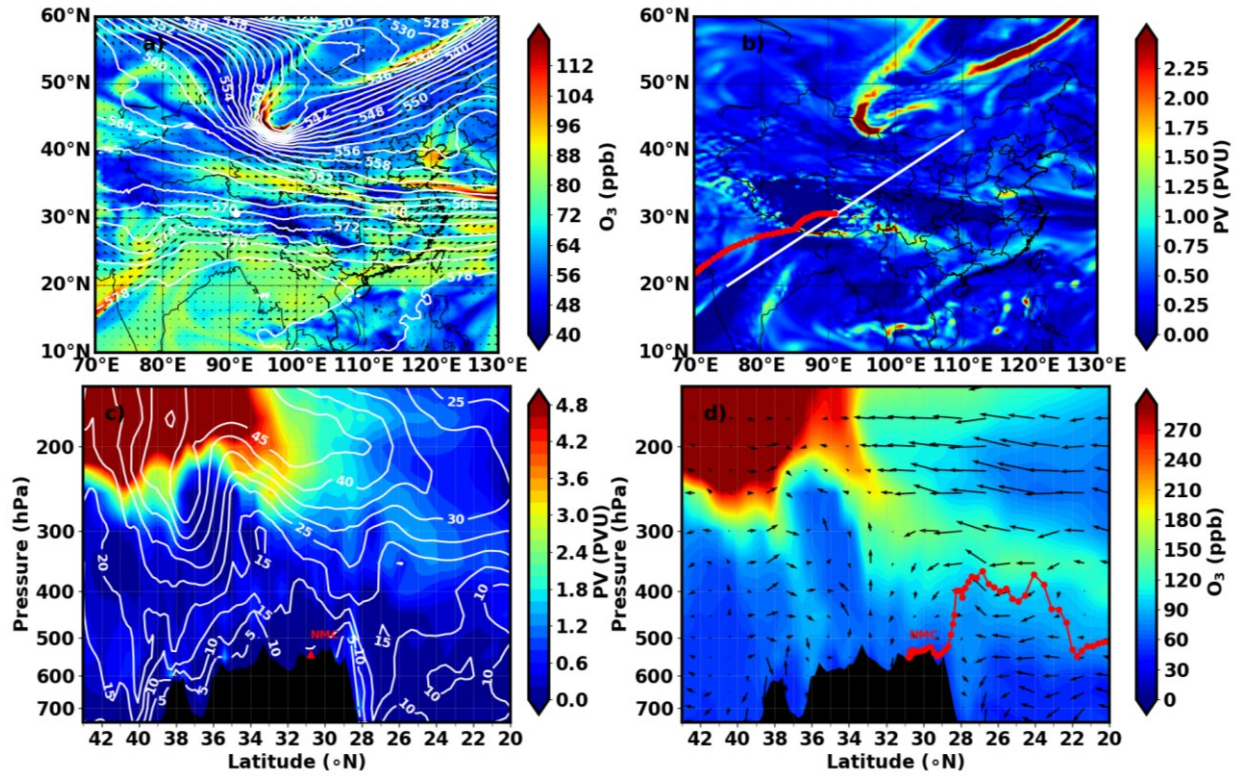

40  
 41 **Figure S6.** 500hPa ERA5 a) O<sub>3</sub> mixing ratio (shading), geopotential height (white contour lines),  
 42 horizontal winds (black arrows), b) potential vorticity (shading), 72h backward trajectory  
 43 (starting from Nam Co station, red dotted line), and a white line along which the cross section of  
 44 c) potential vorticity, u winds, d) O<sub>3</sub> mixing ratio, v winds and vertical velocity were calculated  
 45 for 4:00 LT 11 May 2019  
 46

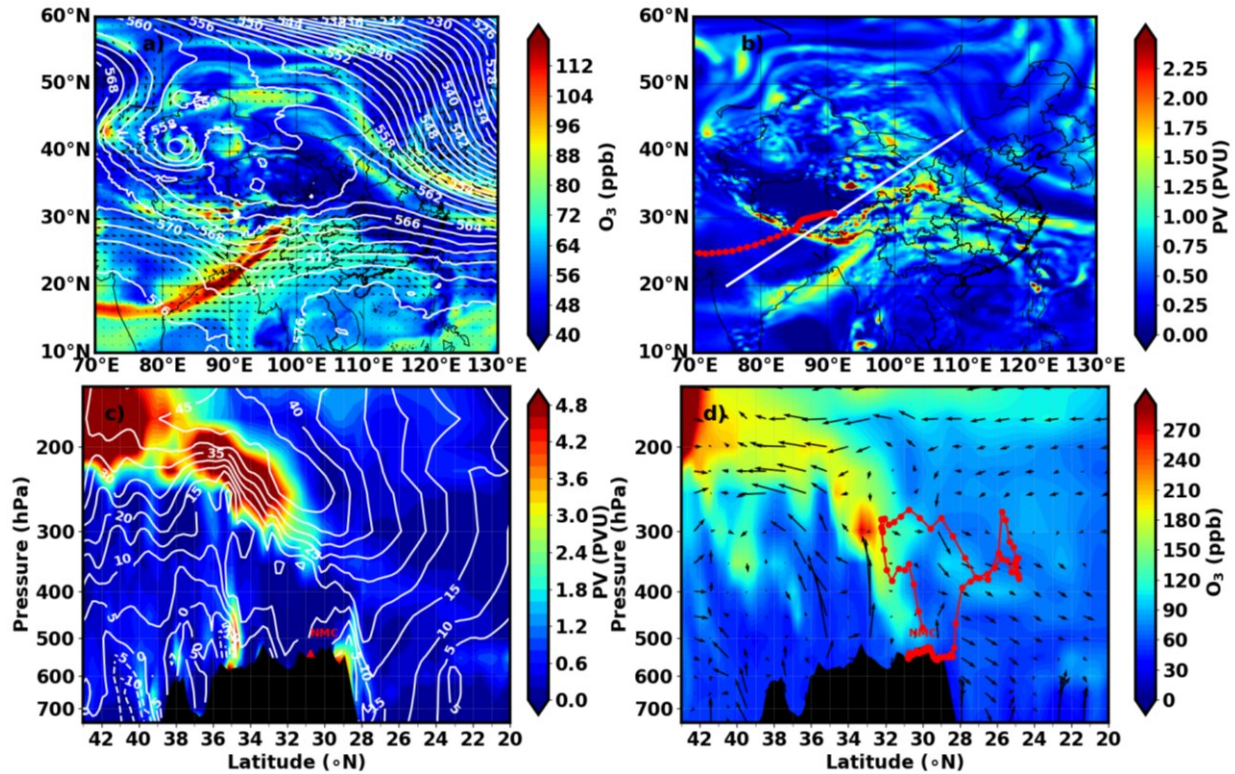

47  
 48 **Figure S7.** 500hPa ERA5 a) O<sub>3</sub> mixing ratio (shading), geopotential height (white contour lines),  
 49 horizontal winds (black arrows), b) potential vorticity (shading), 72h backward trajectory  
 50 (starting from Nam Co station, red dotted line), and a white line along which the cross section of  
 51 c) potential vorticity, u winds, d) O<sub>3</sub> mixing ratio, v winds and vertical velocity were calculated  
 52 for 12:00 LT 6 May 2019



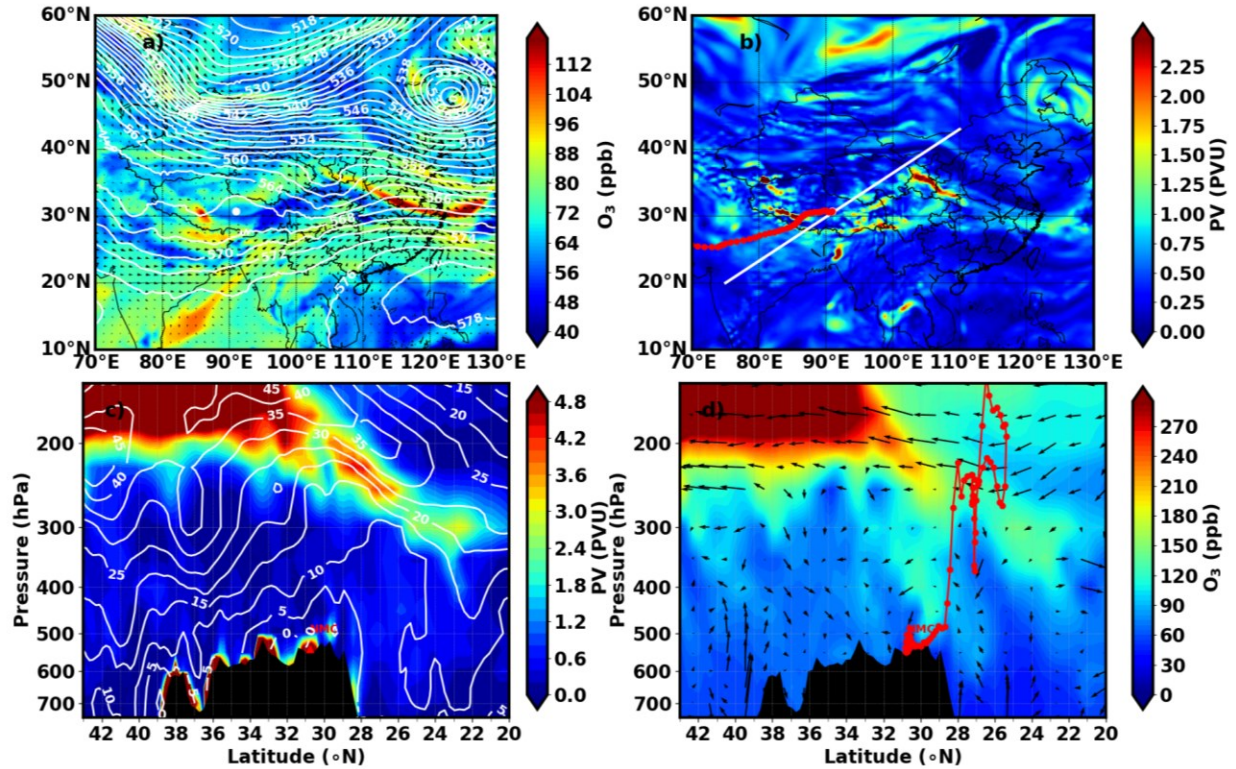

53  
 54 **Figure S8.** 500hPa ERA5 a) O<sub>3</sub> mixing ratio (shading), geopotential height (white contour lines),  
 55 horizontal winds (black arrows), b) potential vorticity (shading), 72h backward trajectory  
 56 (starting from Nam Co station, red dotted line), and a white line along which the cross section of  
 57 c) potential vorticity, u winds, d) O<sub>3</sub> mixing ratio, v winds and vertical velocity were calculated  
 58 for 23:00 LT 13 May 2019  
 59

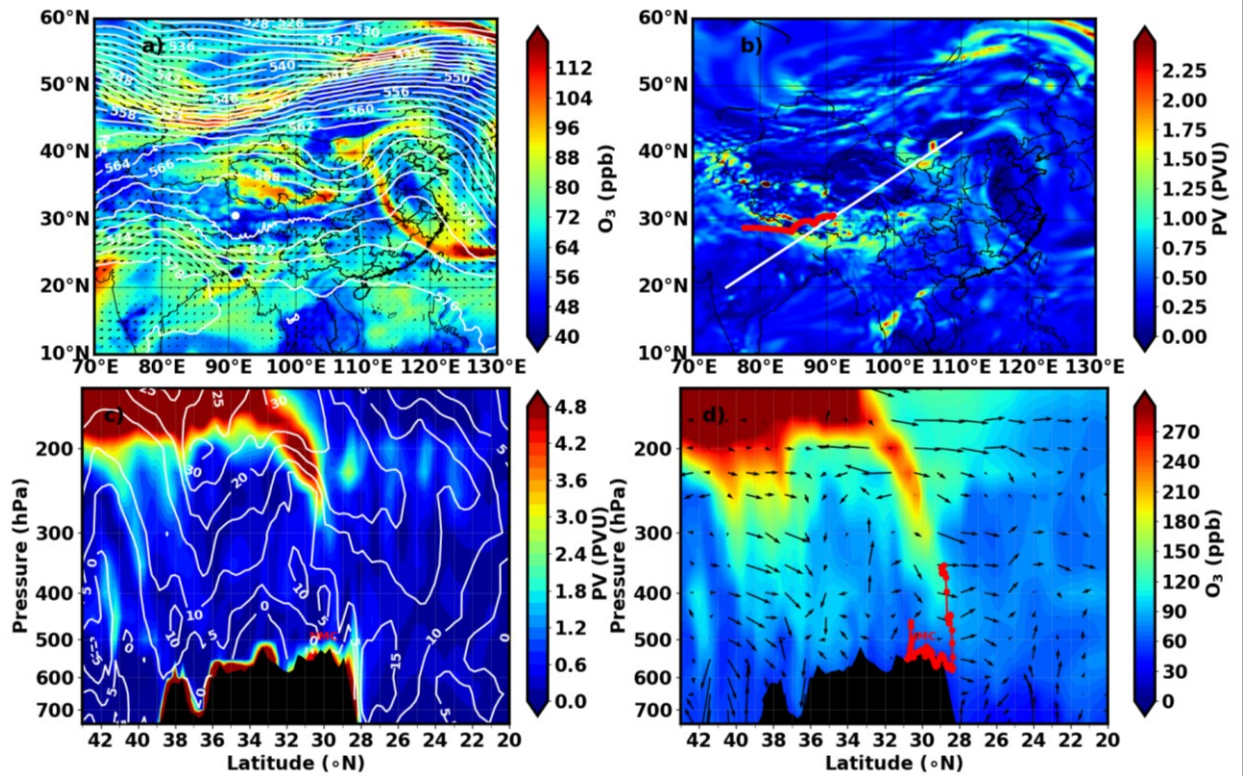

60  
 61 **Figure S9.** 500hPa ERA5 a) O<sub>3</sub> mixing ratio (shading), geopotential height (white contour lines),  
 62 horizontal winds (black arrows), b) potential vorticity (shading), 72h backward trajectory  
 63 (starting from Nam Co station, red dotted line), and a white line along which the cross section of  
 64 c) potential vorticity, u winds, d) O<sub>3</sub> mixing ratio, v winds and vertical velocity were calculated  
 65 for 18:00 LT 23 May 2019  
 66

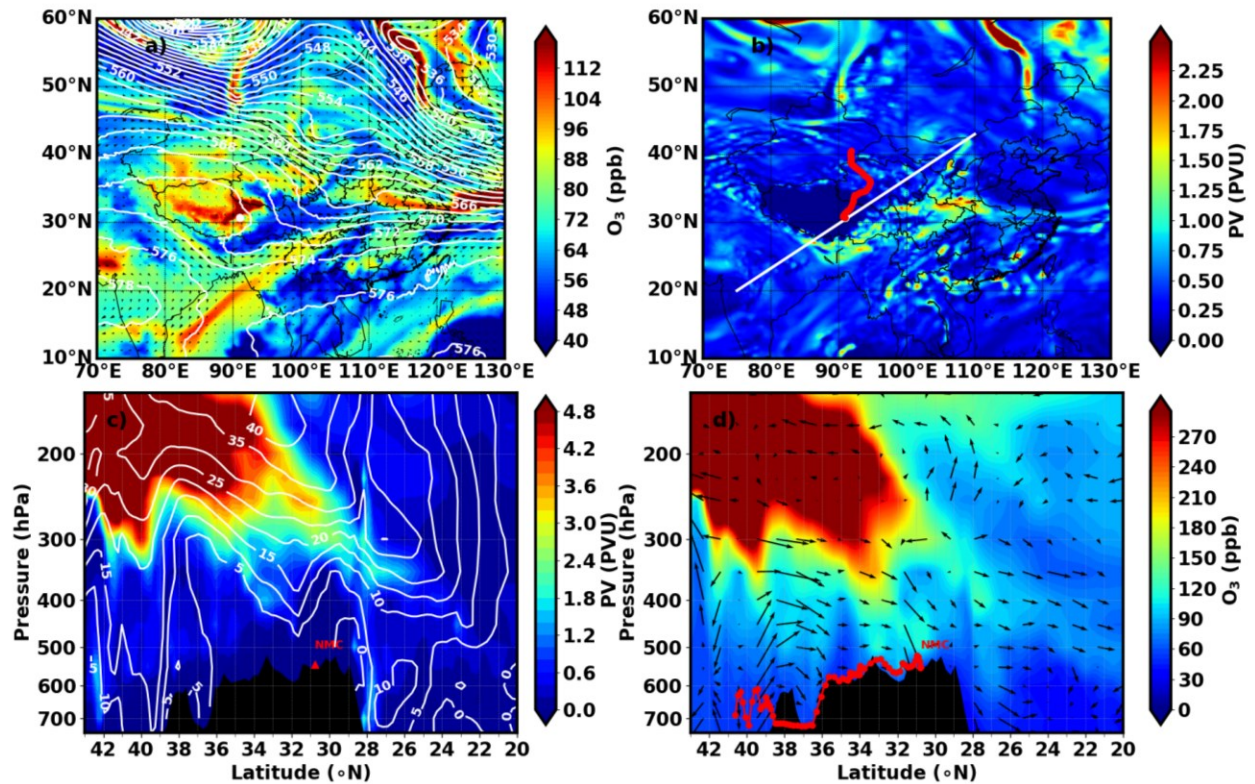

67  
 68 **Figure S10.** 500hPa ERA5 a) O<sub>3</sub> mixing ratio (shading), geopotential height (white contour  
 69 lines), horizontal winds (black arrows), b) potential vorticity (shading), 72h backward trajectory  
 70 (starting from Nam Co station, red dotted line), and a white line along which the cross section of  
 71 c) potential vorticity, u winds, d) O<sub>3</sub> mixing ratio, v winds and vertical velocity were calculated  
 72 for 6:00 LT 31 May 2019

73

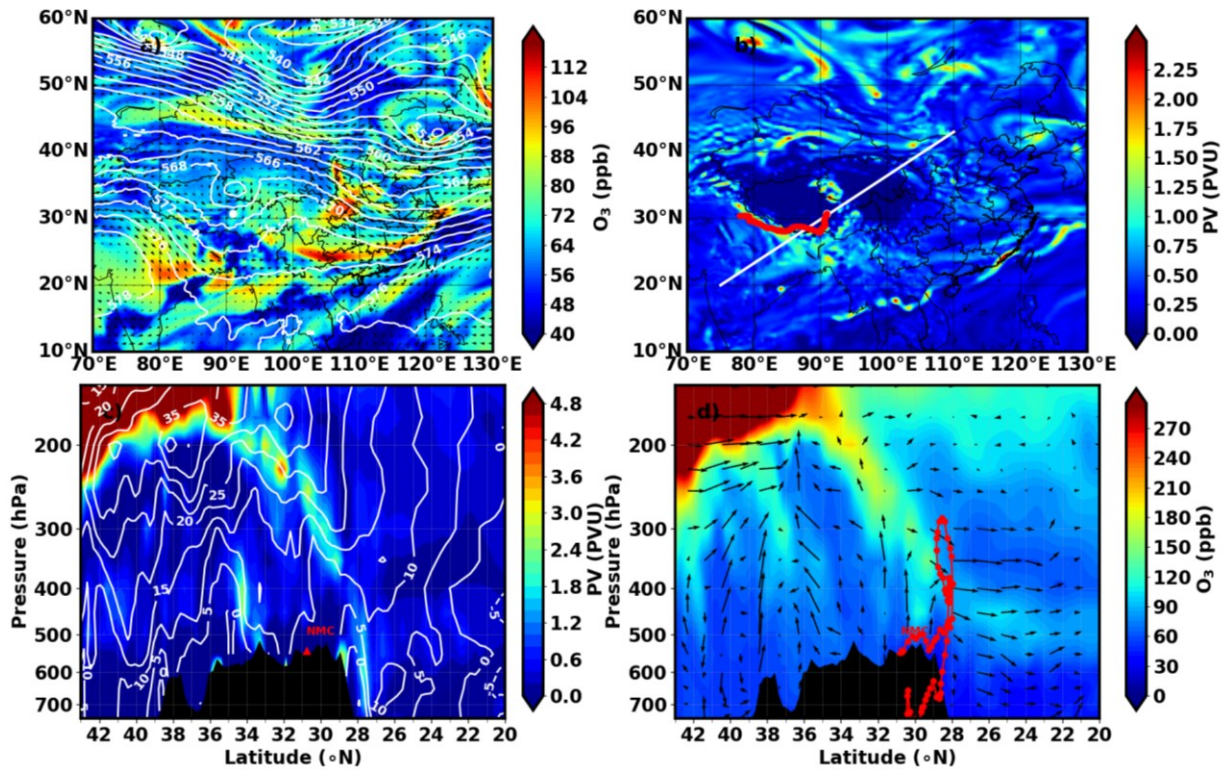

74  
 75 **Figure S11.** 500hPa ERA5 a) O<sub>3</sub> mixing ratio (shading), geopotential height (white contour  
 76 lines), horizontal winds (black arrows), b) potential vorticity (shading), 72h backward trajectory  
 77 (starting from Nam Co station, red dotted line), and a white line along which the cross section of  
 78 c) potential vorticity, u winds, d) O<sub>3</sub> mixing ratio, v winds and vertical velocity were calculated  
 79 for 8:00 LT 3 Jun 2019  
 80

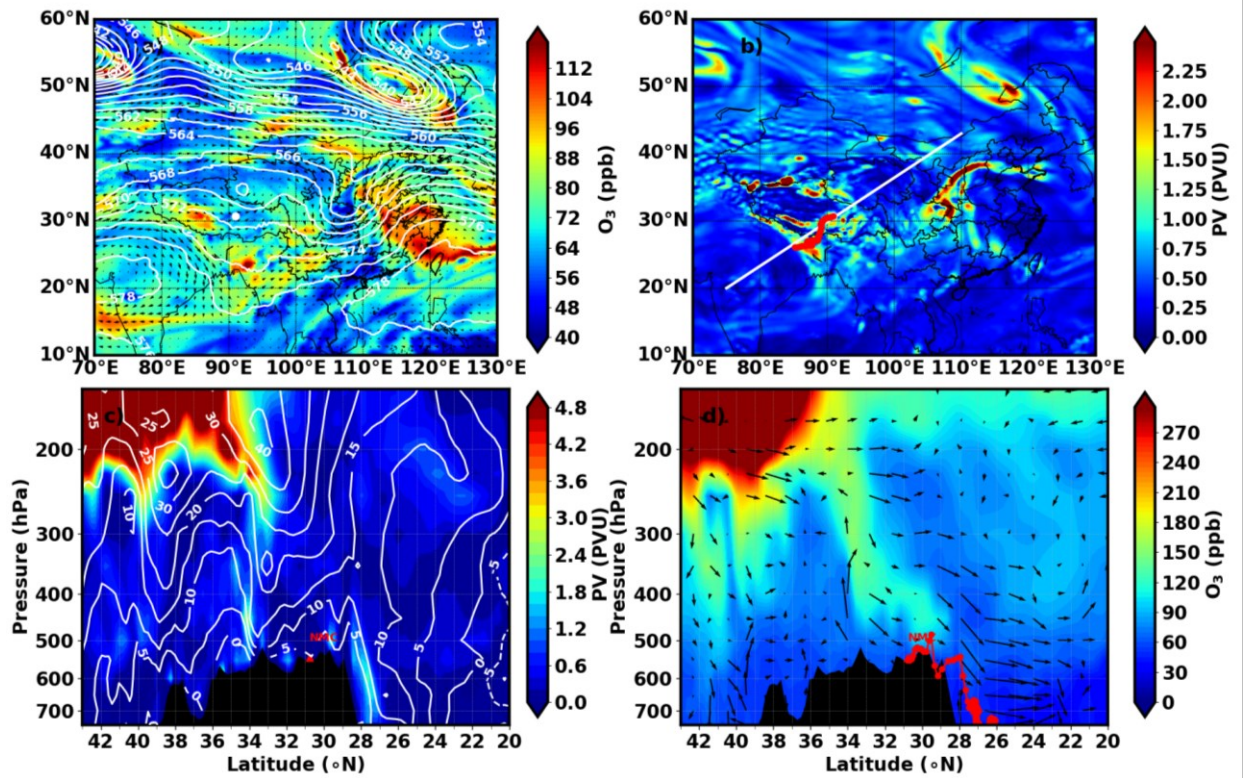

81  
 82 **Figure S12.** 500hPa ERA5 a) O<sub>3</sub> mixing ratio (shading), geopotential height (white contour  
 83 lines), horizontal winds (black arrows), b) potential vorticity (shading), 72h backward trajectory  
 84 (starting from Nam Co station, red dotted line), and a white line along which the cross section of  
 85 c) potential vorticity, u winds, d) O<sub>3</sub> mixing ratio, v winds and vertical velocity were calculated  
 86 for 2:00 LT 5 Jun 2019

87

88

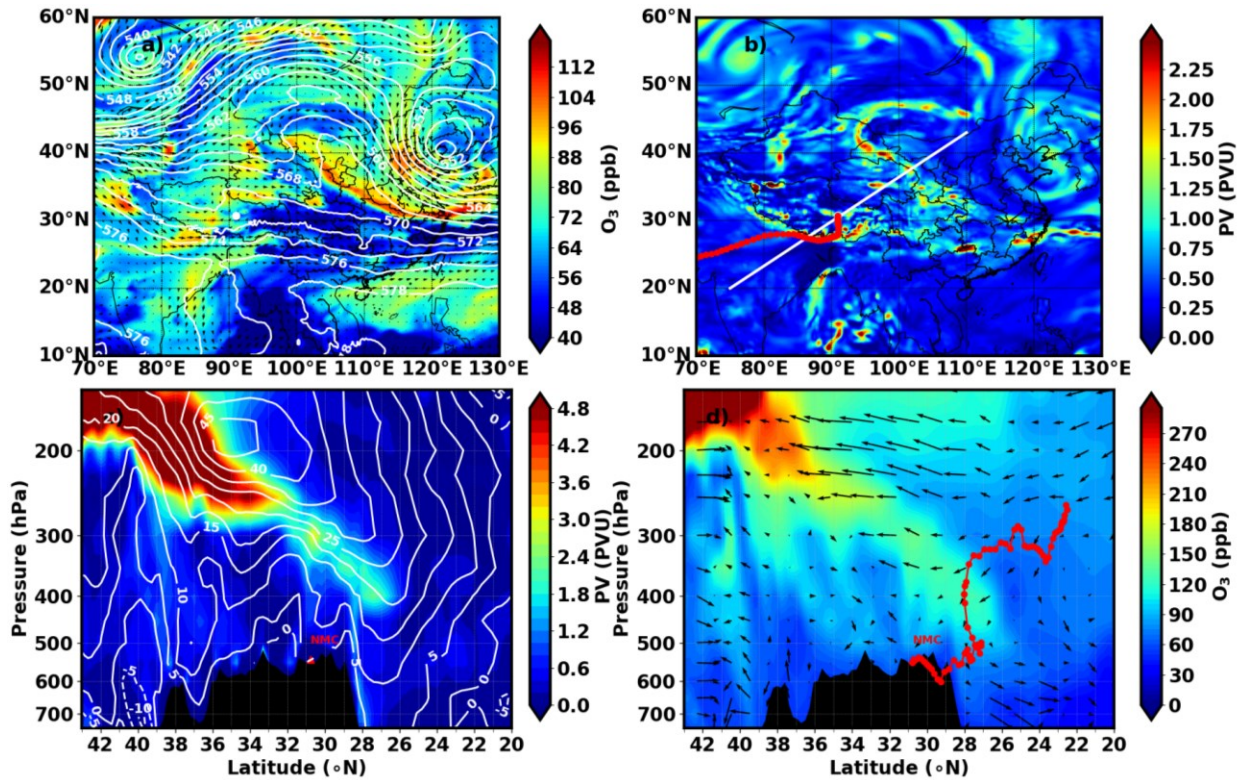

89  
 90 **Figure S13.** 500hPa ERA5 a) O<sub>3</sub> mixing ratio (shading), geopotential height (white contour  
 91 lines), horizontal winds (black arrows), b) potential vorticity (shading), 72h backward trajectory  
 92 (starting from Nam Co station, red dotted line), and a white line along which the cross section of  
 93 c) potential vorticity, u winds, d) O<sub>3</sub> mixing ratio, v winds and vertical velocity were calculated  
 94 for 2:00 LT 9 Jun 2019

95

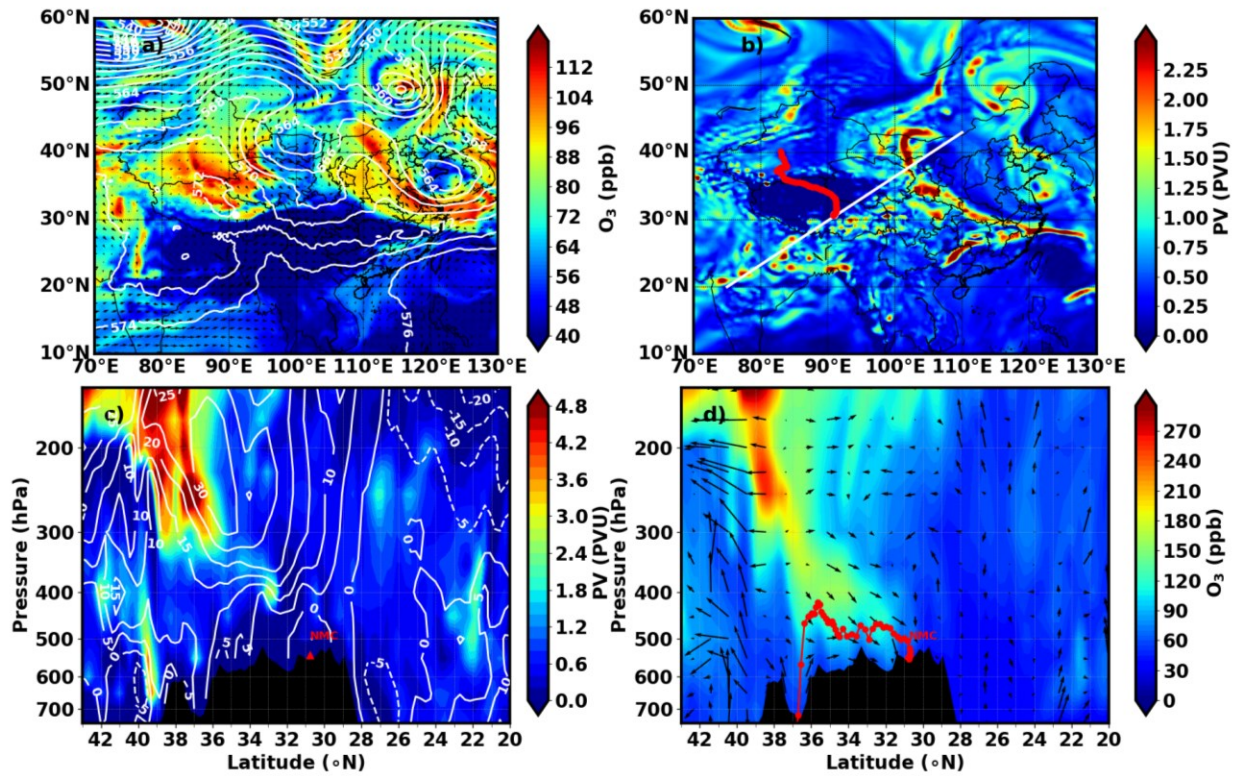

96  
 97  
 98  
 99  
 100  
 101  
 102

**Figure S14.** 500hPa ERA5 a) O<sub>3</sub> mixing ratio (shading), geopotential height (white contour lines), horizontal winds (black arrows), b) potential vorticity (shading), 72h backward trajectory (starting from Nam Co station, red dotted line), and a white line along which the cross section of c) potential vorticity, u winds, d) O<sub>3</sub> mixing ratio, v winds and vertical velocity were calculated for 9:00 LT 7 Jul 2019

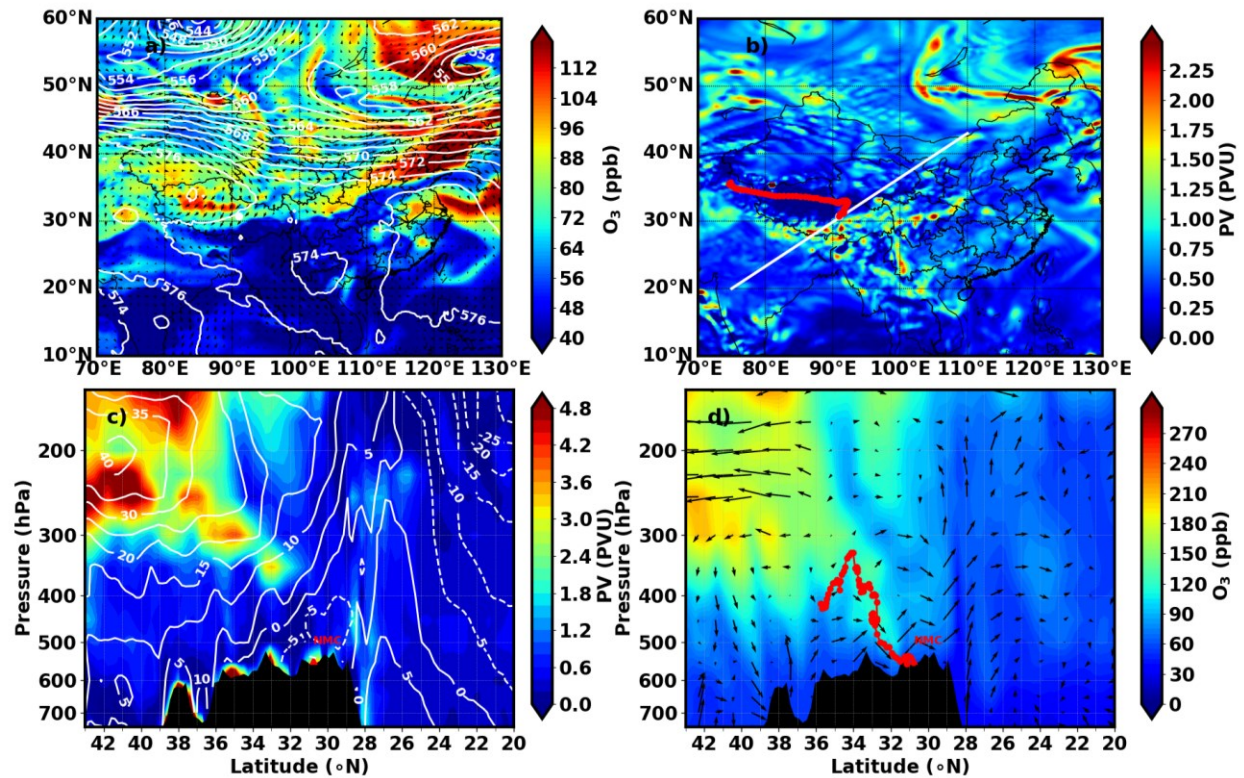

103  
 104  
 105  
 106  
 107  
 108  
 109  
 110

**Figure S15.** 500hPa ERA5 a) O<sub>3</sub> mixing ratio (shading), geopotential height (white contour lines), horizontal winds (black arrows), b) potential vorticity (shading), 72h backward trajectory (starting from Nam Co station, red dotted line), and a white line along which the cross section of c) potential vorticity, u winds, d) O<sub>3</sub> mixing ratio, v winds and vertical velocity were calculated for 16:00 LT 23 Jul 2019



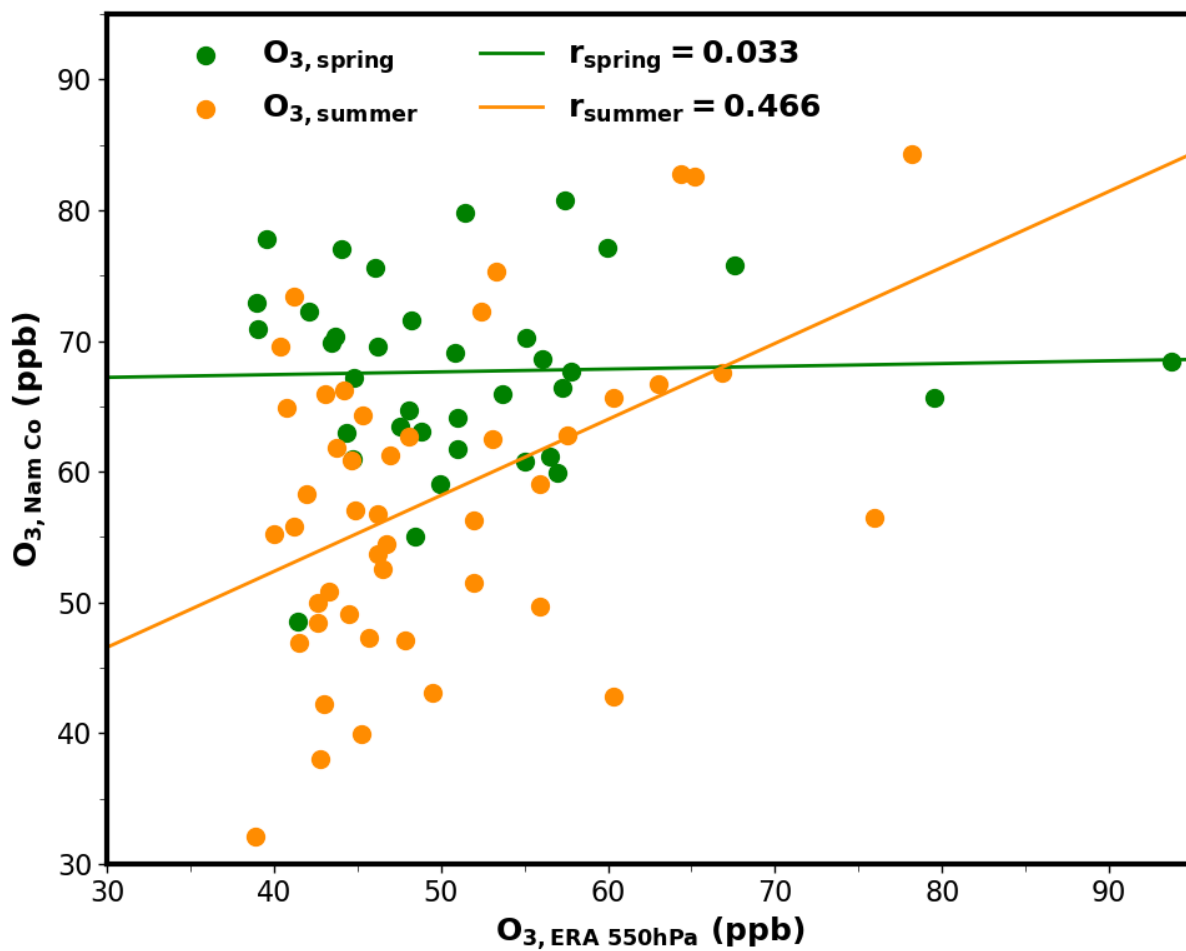

111  
 112 **Figure S16.** Correlation between spring (green) and summertime (orange) O<sub>3</sub> observations at  
 113 Nam Co (O<sub>3</sub>, Nam Co) and O<sub>3</sub> mixing ratio at 550 hPa from the ERA5 reanalysis data
